# Supplementary material
Source: bioRxiv or medRxiv preprint supplement (https://medrxiv.org/highwire/filestream/80521/field_highwire_adjunct_files/0/2020.04.16.20067496-1.pdf)
Supplement: Supplementary file [file 2020.04.16.20067496-1.pdf]

# Supplementary Information

## Seasonality

In Figure S1, we present plots analogous to Figure 1.b in the main text, calculated for four representative months: January, representing winter and corresponding to the period when the COVID-19 outbreak started; April, representing spring; July, for the summer period ; and October representing autumn.

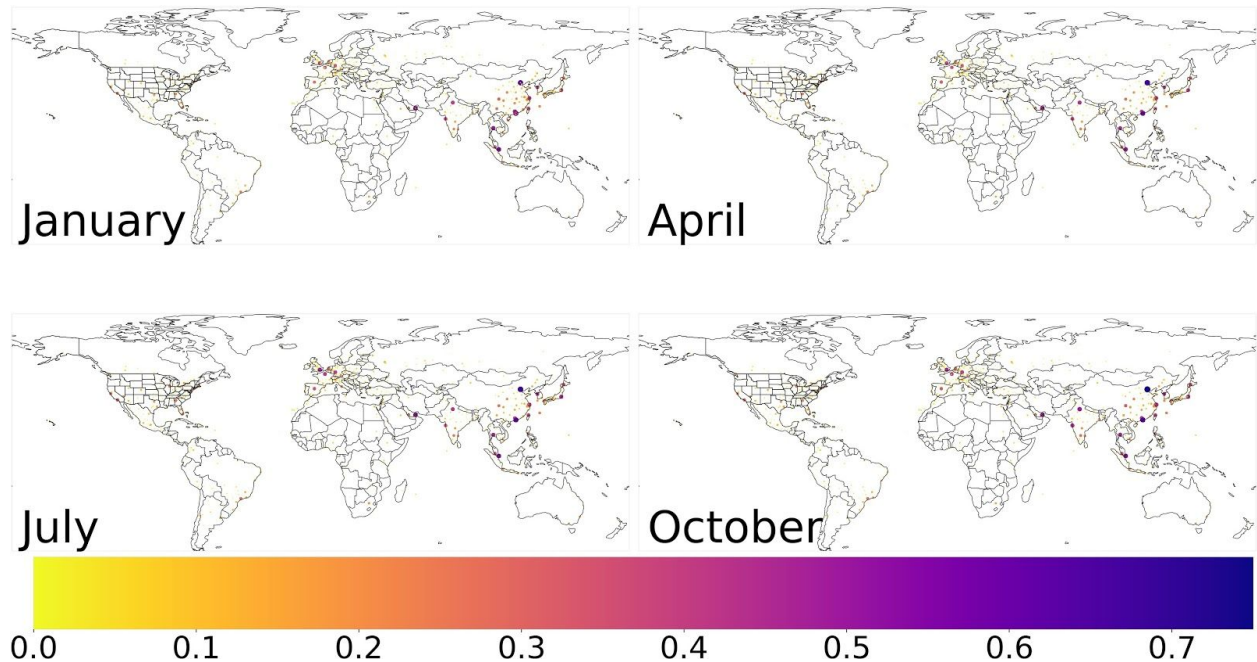

**Figure S1:** Risk measure for different months. Note that for visualization purposes, the color scale is truncated to  $[0,0.75]$ . Circle area is proportional to risk.

## Infectious period

We analysed different values of the shape parameter  $\kappa$  of the gamma distribution of the infectious period (see Methods in the main text) The second was done for different values of  $R$ .

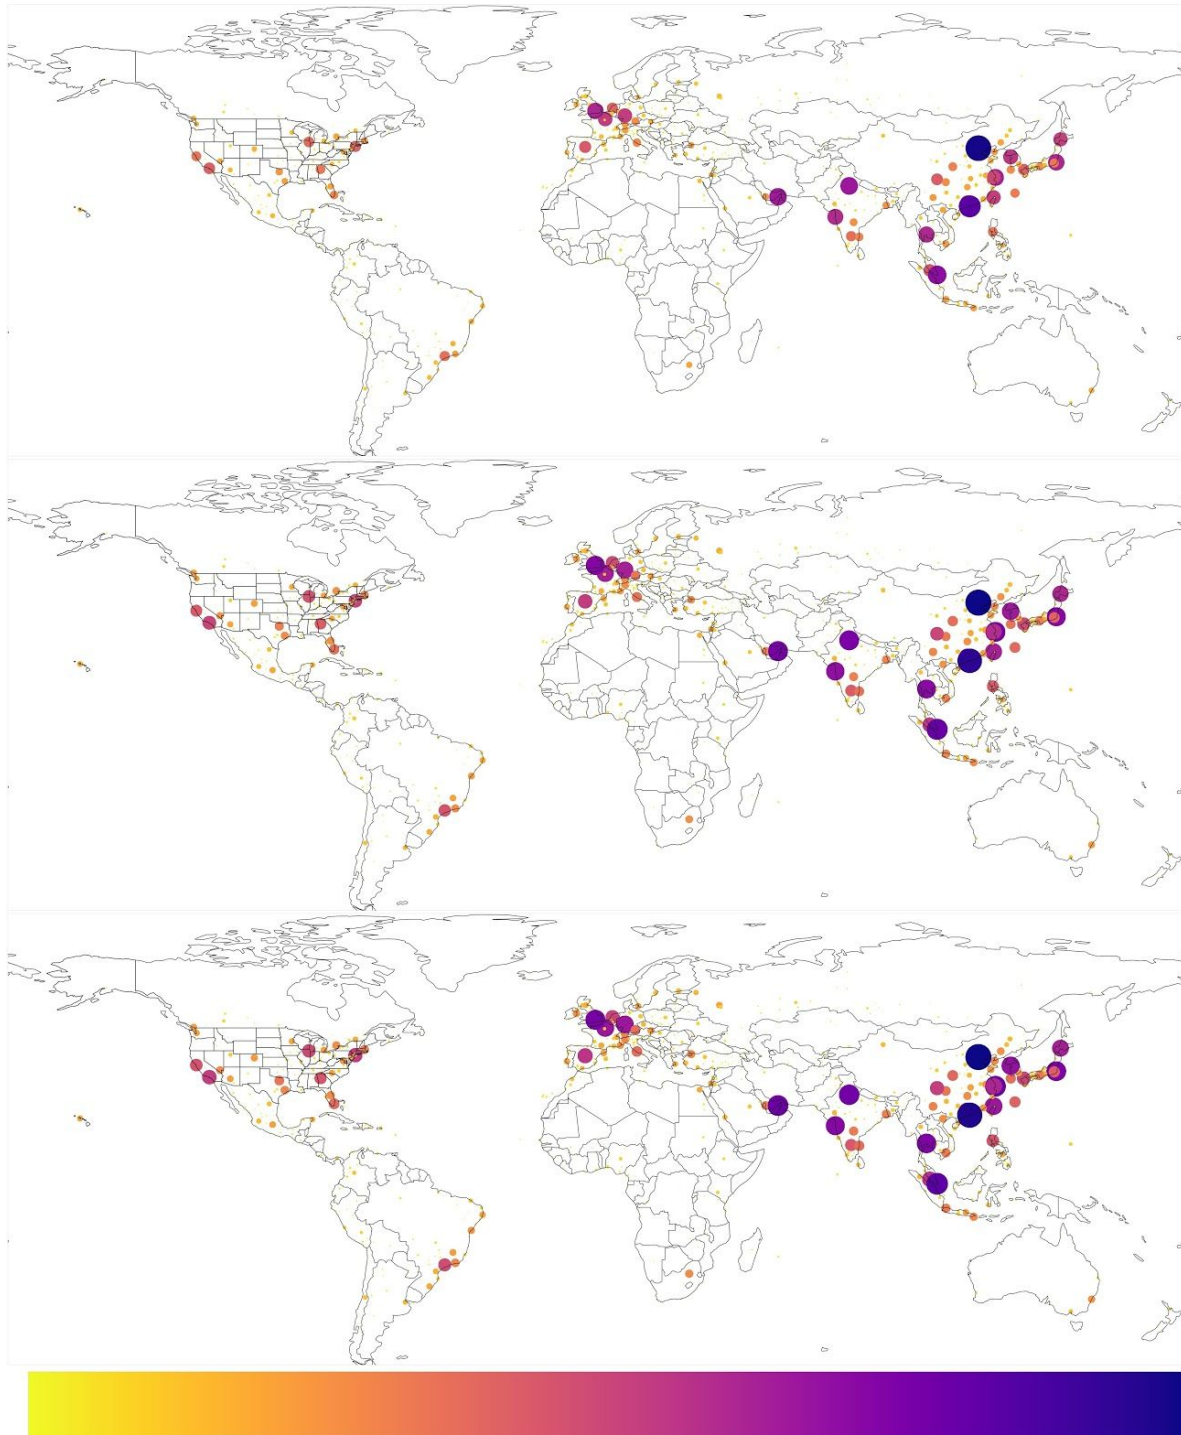

**Figure S2:** Risk measure for (top to bottom)  $\kappa = 1, 3, 6$ . Compare to Figure 1.b from the main text. Note that for visualization purposes, the color scale is truncated to  $[0,0.75]$ . Circle area is proportional to risk.

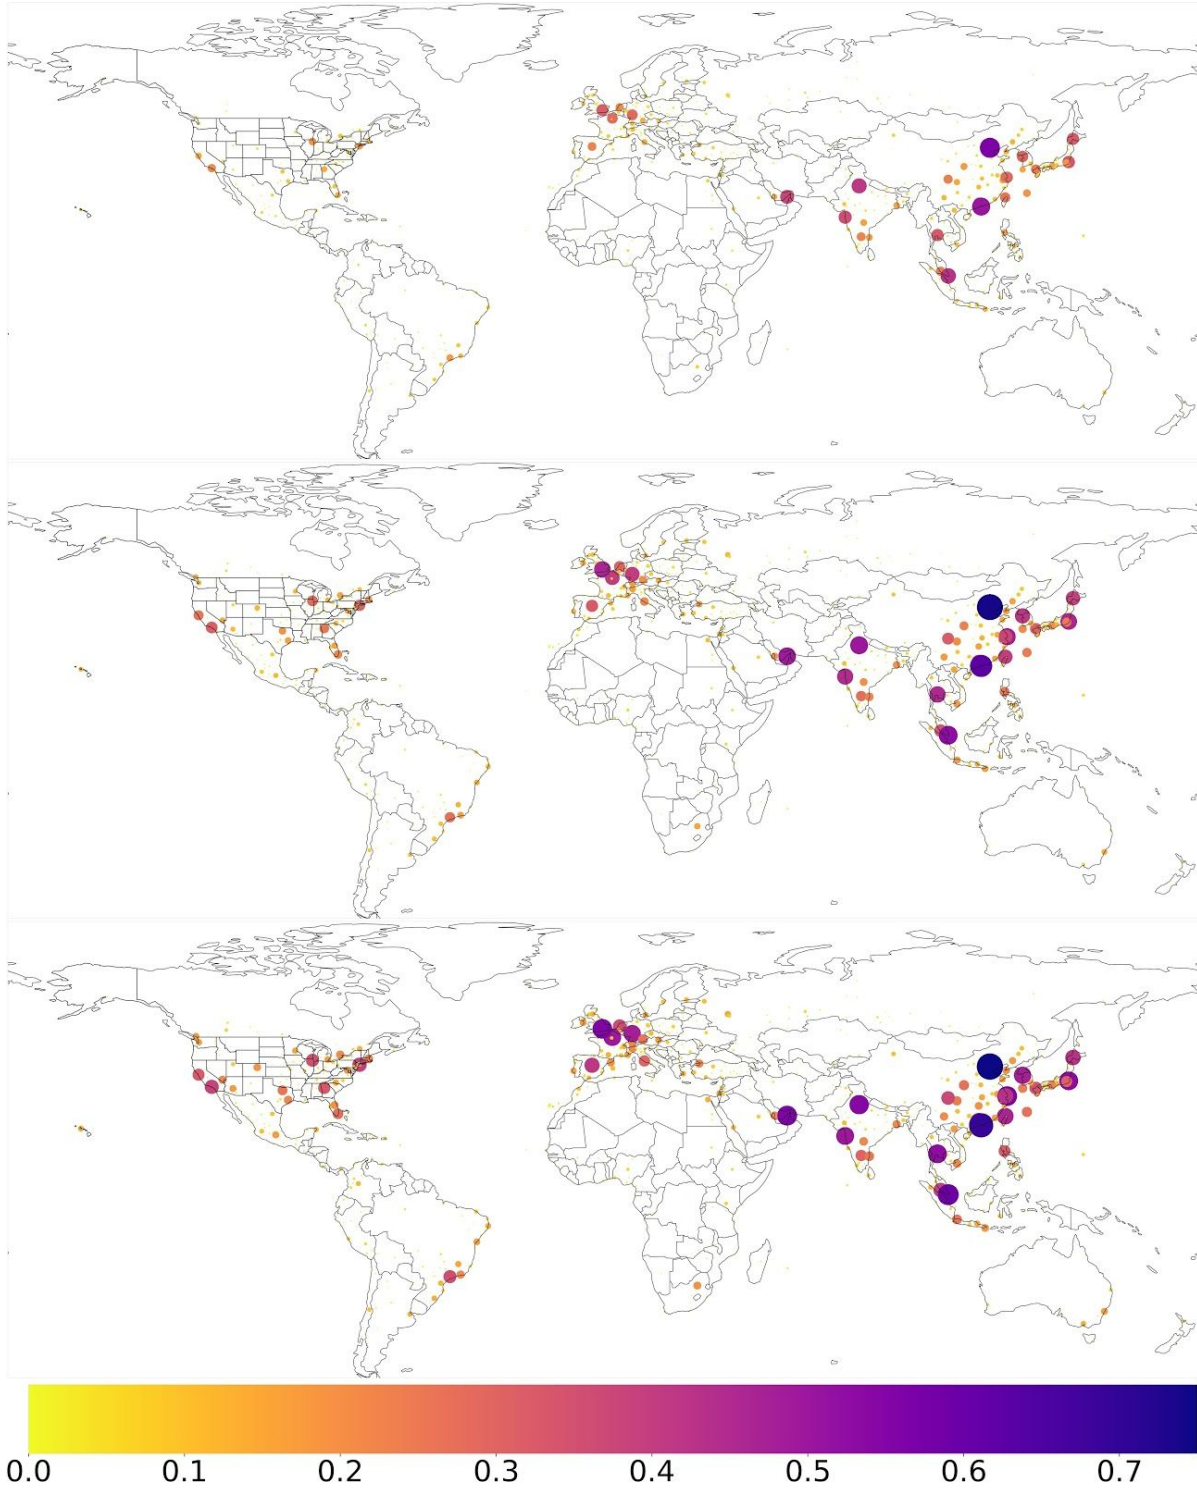

**Figure S3:** Risk measure for (top to bottom)  $R_0 = 2, 3, 4$ . Compare to Figure 1.b from the main text. Note that for visualization purposes, the color scale is truncated to  $[0,0.75]$ . Circle area is proportional to risk.

## Superspreaders

Extending the calculation performed in [1] , we can calculate the probability of an outbreak from superspreaders by defining  $\alpha$  as the fraction of superspreaders;  $\beta^{(1)}, \beta^{(2)}$  as the transmission coefficients of superspreaders and non-superspreaders, respectively; and  $q_{ij}$  as the probability of not causing sustained transmission from  $i$  superspreaders and  $j$  non-superspreaders. Hence

$$q_{1,0} = \alpha \beta^{(1)} / (\beta^{(1)} + \gamma) q_{1,0}^2 + (1 - \alpha) \beta^{(1)} / (\beta^{(1)} + \gamma) q_{1,0} q_{0,1} + \gamma / (\beta^{(1)} + \gamma)$$

$$q_{0,1} = \alpha \beta^{(2)} / (\beta^{(2)} + \gamma) q_{1,0} q_{0,1} + (1 - \alpha) \beta^{(2)} / (\beta^{(2)} + \gamma) q_{0,1}^2 + \gamma / (\beta^{(2)} + \gamma)$$

Finally,  $\alpha q_{1,0} + (1 - \alpha) q_{0,1}$  provides the probability of not causing an outbreak in case of superspreaders. We explore this scenario with  $\alpha = 0.01, \beta^{(1)} / \beta^{(2)} = 5, \gamma = 7, \beta^{(2)} = R \gamma$  for  $R = 3$  below. Varying parameter values produced similar results.

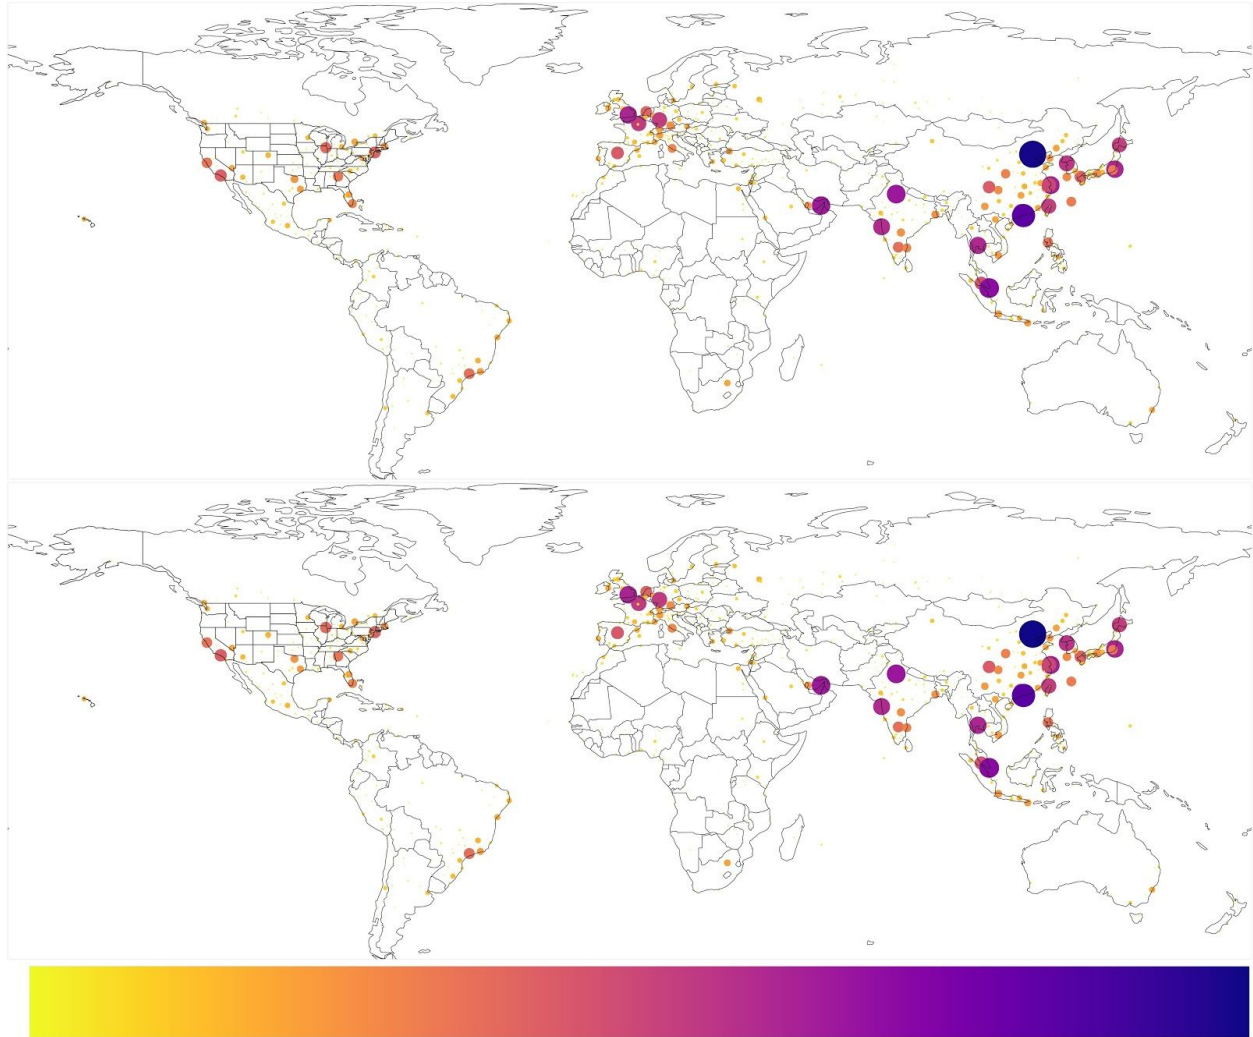

**Figure S4:** Risk measure with (bottom) and without (top) superspreaders. Compare to Figure 1.b from the main text. Note that for visualization purposes, the color scale is truncated to  $[0,0.75]$ . Circle area is proportional to risk.

## Outbreak risk by airport

Below we show the probability of an outbreak caused by introducing one infected individual landing at a specific airport.

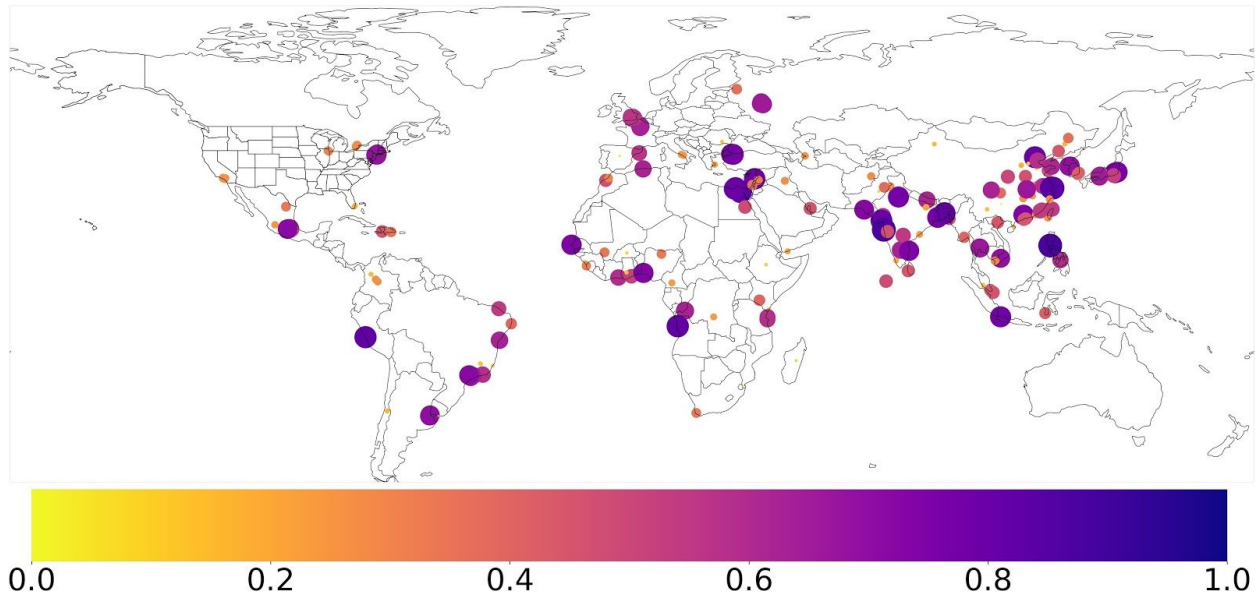

**Figure S5:** Likelihood of initiating an outbreak by introducing one infected individual in a city. Many of the cities most susceptible to outbreaks are in India and China. Circle area is proportional to risk.

**Supplementary table S1:** The risk of outbreak posed by each airport, along with some metadata (region, continent, etc.) extracted from [2].

**Supplementary table S2:** The risk of outbreak posed by introducing one infected individual at an airport, along with the calculated density and reproduction number estimated for each airport.

**Supplementary table S3:** The full table of risks. Includes origin and destination airport names, as well as the predicted traffic between them for the month of October, with lower and upper bounds, according to [3]. Column  $\text{risk}_i$  is the risk of an outbreak caused by passengers travelling from the origin airport,  $\text{dest\_p\_no\_outbreak}$  is the probability that no outbreak at the destination is initiated by a passenger from the origin, and  $\text{risk}_{ij}$  is  $1 - \text{dest\_p\_no\_outbreak}$ . The table also contains coordinates for the origin and destination, as well as other metadata.

## **References**

- [1] R. N. Thompson, "Novel coronavirus outbreak in Wuhan, China, 2020: Intense surveillance is vital for preventing sustained transmission in new locations," *J. Clin. Med.*, vol. 9, no. 2, p. 498, 2020.
- [2] "Ourairports.com. 2020.," *Ourairports*. <https://ourairports.com/> (accessed Apr. 10, 2020).
- [3] L. Mao, X. Wu, Z. Huang, and A. J. Tatem, "Modeling monthly flows of global air travel passengers: An open-access data resource," *J. Transp. Geogr.*, vol. 48, pp. 52–60, 2015.
